# Supplementary material for: The anti-inflammatory and antioxidant effects of pigmented rice consumption in an obese cohort
Source: Royal Society of Chemistry journal article supplement (doi:10.1039/c9fo02261a), 2019-01-01
Supplement: c9fo02261a1.pdf [file c9fo02261a1.pdf]

**Supplementary Table 1** Quantification of polyphenols in coloured rice varieties (mg 100 g<sup>-1</sup>). Phenolic compounds were detected at 280 nm. Anthocyanins were detected at 520 nm. Adapted from Callcott, *et al.* (2018).

| Rice Variety          | Peak | CAT   | FA    | GA    | <i>o</i> -C | <i>p</i> -C | PCA   | SYR   | VA    | C3G    | P3G   |
|-----------------------|------|-------|-------|-------|-------------|-------------|-------|-------|-------|--------|-------|
| <b>Reiziq (brown)</b> | Mean | 0.136 | 0.074 | 0.085 | 0.091       | 0.000       | 0.092 | 0.098 | 0.119 | -      | -     |
|                       | SD   | 0.009 | 0.007 | 0.001 | 0.003       | 0.005       | 0.002 | 0.003 | 0.004 |        |       |
| <b>Yunlu29 (red)</b>  | Mean | 0.812 | 0.072 | 0.097 | 0.896       | 0.000       | 0.126 | 0.109 | 0.101 | -      | -     |
|                       | SD   | 0.165 | 0.012 | 0.005 | 0.335       | 0.016       | 0.007 | 0.002 | 0.006 |        |       |
| <b>Purple</b>         | Mean | 0.150 | 0.049 | 0.093 | 0.286       | 0.000       | 1.639 | 0.080 | 1.070 | 17.190 | 8.010 |
|                       | SD   | 0.032 | 0.004 | 0.002 | 0.072       | 0.000       | 0.214 | 0.000 | 0.040 | 1.820  | 0.710 |

(-) indicate not detected. CAT, catechin; FA, ferulic acid; GA, gallic acid; *o*-C, *o*-coumaric acid; *p*-C, *p*-coumaric; PCA, protocatechuic acid; SYR, syringic acid; UHPLC, Ultra-High Performance Liquid Chromatography; vanillic acid, VA; C3G, cyanidin-3 -glucoside; P3G, peonidin-3-glucoside.
